# Supplementary material
Source: MDPI journal article supplement (https://www.mdpi.com/2673-8112/3/9/91)
Supplement: s1 [file s1]

**Supplementary Table S1. Inpatient Rehabilitation Outcomes of Non-Ventilated Versus Ventilated Patients**

| Item <sup>a</sup>                     | Non-Ventilated <sup>b</sup> | Ventilated <sup>b</sup> | P Value            | Z Score |
|---------------------------------------|-----------------------------|-------------------------|--------------------|---------|
| Age at Admission                      | 68 (62, 76)                 | 55 (44.5, 60)           | <.001 <sup>c</sup> | -6.168  |
| LOS Acute                             | 20 (10.5, 29.5)             | 34 (24, 59.5)           | <.001 <sup>c</sup> | 4.409   |
| LOS Inpatient Rehab                   | 13 (8, 18)                  | 16 (11, 22.5)           | .019 <sup>c</sup>  | 2.341   |
| GG Total Admission                    | 67 (54, 73)                 | 53 (36, 62)             | <.001 <sup>c</sup> | -3.768  |
| GG Total Discharge                    | 115 (100, 123.5)            | 120 (105, 126)          | .229               | 1.204   |
| GG Total Gain                         | 46 (36.5, 54.5)             | 63 (48, 71.5)           | <.001 <sup>c</sup> | 3.864   |
| 6MWT – Admission (ft)                 | 110 (58, 190)               | 55 (0, 117.5)           | .008 <sup>c</sup>  | -2.658  |
| 6MWT – Discharge (ft)                 | 297 (180, 460)              | 525 (282.5, 682.5)      | .004 <sup>c</sup>  | 2.856   |
| Inspiratory Capacity – Admission (mL) | 900 (733.5, 1250)           | 842 (500, 1258.25)      | .779               | -.281   |
| Inspiratory Capacity – Discharge (mL) | 1167 (866.5, 1458)          | 1250 (933, 1712.5)      | .151               | 1.438   |
| Supplemental Oxygen – Admission (L)   | 3 (1, 6)                    | 5 (2, 8)                | .073               | -1.792  |
| Supplemental Oxygen – Discharge (L)   | 1 (0, 4)                    | 1.5 (0, 4)              | .626               | -.487   |
| EQ-VAS - Admission                    | 50 (40, 75)                 | 50 (30, 72.5)           | .280               | -1.080  |
| EQ-VAS - Discharge                    | 75 (60, 85)                 | 75 (66.25, 84.75)       | .913               | .109    |

<sup>a</sup>Abbreviations: ft, Feet; LOS, Length of Stay; L, Liter; mL, Milliliter; Rehab, Rehabilitation. <sup>b</sup>Data displayed as Median (Interquartile Range). <sup>c</sup>Indicates significance at the P < 0.05 level.

**Supplementary Table S2: Spearman's Rank-Order Correlations Between Lengths of Stay, Days on Ventilator, Cognitive Status, and Outcomes at 6 Month Follow-Up** Spearman's  $\rho$  values are shown.

| Item <sup>a</sup>                  | LOS Acute         | Days on Ventilator | LOS Inpatient Rehab | BIMS              | MoCA  | Oxygen Use – 6 Months | EQ-VAS – 6 Months  | GG Mobility Subset – 6 Months |
|------------------------------------|-------------------|--------------------|---------------------|-------------------|-------|-----------------------|--------------------|-------------------------------|
| Days on Ventilator                 | .525 <sup>b</sup> |                    |                     |                   |       |                       |                    |                               |
| LOS Inpatient Rehab                | .389 <sup>b</sup> | .490 <sup>b</sup>  |                     |                   |       |                       |                    |                               |
| BIMS                               | .026              | -.146              | -.110               |                   |       |                       |                    |                               |
| MoCA                               | .308 <sup>b</sup> | .129               | .132                | .394 <sup>b</sup> |       |                       |                    |                               |
| Oxygen Use – 6 Months              | -.117             | .243               | .096                | .236              | .105  |                       |                    |                               |
| EQ-VAS – 6 Months                  | .024              | -.119              | .006                | -.025             | .150  | -.306 <sup>b</sup>    |                    |                               |
| GG Mobility Item Subset – 6 Months | .212              | .100               | -.051               | .043              | .152  | -.276                 | .321 <sup>b</sup>  |                               |
| Post-COVID Condition Symptoms      | -.054             | .037               | .086                | .033              | -.084 | .531 <sup>b</sup>     | -.440 <sup>b</sup> | -.309 <sup>b</sup>            |

<sup>a</sup>Abbreviations: BIMS, Brief Interview of Mental Status; LOS, Length of Stay; MoCA, Montreal Cognitive Assessment. <sup>b</sup>Indicates significance at the  $P < 0.01$  level.
